# Supplementary material
Source: PubMed Central journal article supplement (PMC6718356)
Supplement: jps-44-3-D19-028_s001.pdf [file jps-44-3-D19-028_s001.pdf]

# Journal of Pesticide Science

supplementary materials

DOI:10.1584/jpestics.D19-028

## **Synthesis and antifungal activity of novel pyrazolines and isoxazolines derived from cuminaldehyde**

Tao ZHANG, Mengya DONG, Jianjiang ZHAO,

Xiaofang ZHANG and Xiangdong MEI

Pesticide Science Society of Japan

*<http://pssj2.jp/eng/>*

*3-(2-methylphenyl)-5-(4-isopropylphenyl)isoxazoline (2a)*

Yield 57%; white powder; mp: 124-125°C; <sup>1</sup>H-NMR (300 MHz, DMSO-d<sub>6</sub>) δ: 7.69-7.28(m, 8H), 4.32-4.35 (dd, *J*=8.66 Hz, 1H), 3.60-3.67 (dd, *J*=21.37 Hz, 1H), 3.02-3.08 (dd, *J*=19.03 Hz, 1H), 2.86-3.00 (m, 1H), 2.32 (s, 3H), 1.16-1.18 (d, *J*=6.9 Hz, 6H); <sup>13</sup>C-NMR (DMSO-d<sub>6</sub>): 21.22, 24.09, 30.61, 33.27, 63.60, 125.04, 125.94, 126.26, 129.11, 129.85, 131.17, 136.10, 139.99, 146.36, 155.21; HRMS *m/z* (M<sup>+</sup>): Calcd. for C<sub>19</sub>H<sub>21</sub>NO: 280.1623, found: 280.1631.

*3-(2-bromophenyl)-5-(4-isopropylphenyl)isoxazoline (2b)*

Yield 49%; brown powder; mp: 152-153°C; <sup>1</sup>H-NMR (300 MHz, DMSO-d<sub>6</sub>) δ: 7.13-7.42 (m, 8H), 4.30-4.34 (dd, *J*=13.7 Hz, 1H), 3.47-3.54 (q, *J*=21.7 Hz, 1H), 3.01-3.07 (dd, *J*=19.3 Hz, 1H), 2.96-2.98 (m, 1H), 1.15-1.17 (d, *J*=6.9 Hz, 6H); <sup>13</sup>C-NMR (DMSO-d<sub>6</sub>): 23.96, 30.87, 42.36, 62.30, 123.20, 125.92, 126.88, 129.13, 131.65, 133.70, 137.48, 138.46, 146.51, 153.02; HRMS *m/z* (M<sup>+</sup>): Calcd. for C<sub>18</sub>H<sub>18</sub>BrNO: 344.0572, found: 344.0576.

*3-(2-chlorophenyl)-5-(4-isopropylphenyl)isoxazoline (2c)*

Yield 53%; white powder; mp: 138-139°C; <sup>1</sup>H-NMR (300 MHz, DMSO-d<sub>6</sub>) δ: 7.10-7.40 (m, 8H), 4.14-4.17 (dd, *J*=8.62 Hz, 1H), 3.15-3.22 (dd, *J*=22.42 Hz, 1H), 2.90-2.96 (dd, *J*=18.91 Hz, 1H), 2.80-2.86 (m, 1H), 1.15-1.17 (d, *J*=6.9 Hz, 6H); <sup>13</sup>C-NMR (DMSO-d<sub>6</sub>): 24.07, 30.92, 33.27, 63.46, 125.08, 126.14, 127.09, 128.13, 129.85, 130.46, 133.03, 138.66, 139.28, 147.36, 155.21; HRMS *m/z* (M<sup>+</sup>): Calcd. for C<sub>18</sub>H<sub>18</sub>ClNO: 300.1077, found: 300.1072.

*3-(2-fluorophenyl)-5-(4-isopropylphenyl)isoxazoline (2d)*

Yield 50%; buff crystal; mp: 143-144°C; <sup>1</sup>H-NMR (300 MHz, DMSO-d<sub>6</sub>) δ: 7.13-7.30 (m, 8H), 4.33-4.37 (dd, *J*=13.7 Hz, 1H), 3.58-3.65 (dd, *J*=22.6 Hz, 1H), 2.98-3.03 (dd, *J*=18.8 Hz, 1H), 2.85-2.88 (m, 1H), 1.16-1.18 (d, *J*=6.9 Hz, 6H); <sup>13</sup>C-NMR (DMSO-d<sub>6</sub>): 24.20, 30.40, 33.33, 62.99, 114.62, 120.25, 122.32, 125.73, 129.10, 133.79, 138.83, 149.81, 153.43, 159.21, 161.64; HRMS *m/z* (M<sup>+</sup>): Calcd. for C<sub>18</sub>H<sub>18</sub>FNO: 364.0634, found: 364.0638.

*3-(3-methylphenyl)-5-(4-isopropylphenyl)isoxazoline (2e)*

Yield 60%; white powder; mp: 114-115°C; <sup>1</sup>H-NMR (300 MHz, DMSO-d<sub>6</sub>) δ: 7.13-7.30 (m, 8H), 4.29-4.34 (dd, *J*=13.95 Hz, 1H), 3.59-3.67 (dd, *J*=22.53 Hz, 1H), 2.96-3.02 (dd, *J*=18.51 Hz, 1H), 2.85-2.90 (m, 1H), 2.31 (s, 3H), 1.21-1.24 (d, *J*=6.9 Hz, 6H); <sup>13</sup>C-NMR (DMSO-d<sub>6</sub>): 21.20, 24.08, 30.82, 33.26, 63.50, 123.41, 125.79, 126.90, 127.52, 128.08, 129.04, 136.64, 137.19, 139.99, 146.95, 155.02; HRMS *m/z* (M<sup>+</sup>): Calcd. for C<sub>19</sub>H<sub>21</sub>NO: 279.1623, found: 279.1617.

*3-(3-bromophenyl)-5-(4-isopropylphenyl)isoxazoline (2f)*

Yield 65%; gray powder; mp: 143-144°C <sup>1</sup>H-NMR (300 MHz, DMSO-d<sub>6</sub>) δ: 7.15-7.63 (m, 8H), 4.28-4.33 (dd, *J*=13.78 Hz, 1H), 3.48-3.55 (dd, *J*=21.63 Hz, 1H), 3.01-3.03 (dd, *J*=19.30 Hz, 1H), 2.95-2.98 (m, 1H), 1.21-1.24 (d, *J*=6.9 Hz, 6H); <sup>13</sup>C-NMR (DMSO-d<sub>6</sub>): 24.07, 30.80, 33.25, 56.88, 122.10, 123.23, 124.67, 129.30, 137.17, 142.95, 151.65, 152.4; HRMS *m/z* (M<sup>+</sup>): Calcd. for C<sub>18</sub>H<sub>18</sub>BrNO: 344.0572, found: 344.0576.

*3-(3-chlorophenyl)-5-(4-isopropylphenyl)isoxazoline (2g)*

Yield 62%; white powder; mp: 134-135°C, <sup>1</sup>H-NMR (300 MHz, DMSO-d<sub>6</sub>) δ: 7.06-7.42 (m, 8H), 4.08-4.12 (dd, *J*=13.7 Hz, 1H), 3.14-3.21 (dd, *J*=21.71 Hz, 1H), 2.87-2.93 (dd, *J*=19.32 Hz, 1H), 2.78-2.86 (m, 1H), 1.14-1.16 (d, *J*=6.9 Hz, 6H); <sup>13</sup>C-NMR (DMSO-d<sub>6</sub>): 24.06, 30.86, 33.27, 63.34, 124.84, 125.79, 127.49, 128.13, 129.97, 133.03, 138.92, 139.66, 147.07, 154.09; HRMS *m/z* (M<sup>+</sup>): Calcd. for C<sub>18</sub>H<sub>18</sub>ClNO: 300.1077, found: 300.1072.

*3-(3-fluorophenyl)-5-(4-isopropylphenyl)isoxazoline (2h)*

Yield 61%; yellow crystal; mp: 156-157°C; <sup>1</sup>H-NMR (300 MHz, DMSO-d<sub>6</sub>) δ: 7.14-7.27 (m, 8H), 4.31-4.36 (dd, *J*=13.80 Hz, 1H), 3.57-3.66 (dd, *J*=22.09 Hz, 1H), 2.95-3.02 (dd, *J*=19.23 Hz, 1H), 2.84-2.89 (m, 1H), 1.20-1.23 (d, *J*=6.9 Hz, 6H); <sup>13</sup>C-NMR (DMSO-d<sub>6</sub>): 23.99, 29.53, 33.28, 62.82, 112.96, 115.65, 122.32, 125.87, 128.11, 130.49, 138.93, 149.17, 153.06, 160.51, 163.73; HRMS *m/z* (M<sup>+</sup>): Calcd. for C<sub>18</sub>H<sub>18</sub>FNO: 284.1372, found: 284.1377.

*3-(4-methylphenyl)-5-(4-isopropylphenyl)isoxazoline (2i)*

Yield 67%; white crystal; mp: 115-116°C; <sup>1</sup>H-NMR (300 MHz, CDCl<sub>3</sub>) δ: 7.09-7.38 (m, 8H), 4.08-4.12 (dd, *J*=13.74 Hz, 1H), 3.08-3.16 (q, *J*=22.56 Hz, 1H), 2.95-3.01 (dd, *J*=18.73 Hz, 1H), 2.79-2.81 (m, 1H), 2.28 (s, 3H), 1.14-1.17 (d, *J*=6.9 Hz, 6H); <sup>13</sup>C-NMR (DMSO-d<sub>6</sub>): 20.91, 22.02, 23.81, 24.09, 30.51, 63.59, 126.16, 128.36, 133.39, 138.20, 146.98, 149.01, 153.13, 154.79; HRMS *m/z* (M<sup>+</sup>): Calcd. for C<sub>19</sub>H<sub>21</sub>NO: 280.1623, found: 280.1631.

*3-(4-bromophenyl)-5-(4-isopropylphenyl)isoxazoline (2j)*

Yield 57%; gray crystal; mp: 125-126°C; <sup>1</sup>H-NMR (300 MHz, DMSO-d<sub>6</sub>) δ: 7.05-7.47 (m, 8H), 4.21-4.24 (dd, *J*=13.64 Hz, 1H), 3.42-3.47 (dd, *J*=21.57 Hz, 1H), 3.16-3.22 (dd, *J*=19.13 Hz, 1H), 2.78-2.80 (m, 1H), 1.17-1.19 (d, *J*=6.6 Hz, 6H); <sup>13</sup>C-NMR (DMSO-d<sub>6</sub>): 24.08, 30.51, 33.25, 63.42, 121.72, 125.78, 126.21, 127.52, 128.26, 130.93, 131.19, 135.93, 139.54, 147.07, 154.24; HRMS *m/z* (M<sup>+</sup>): Calcd. for C<sub>18</sub>H<sub>18</sub>BrNO: 344.0572, found: 344.0576.

*3-(4-chlorophenyl)-5-(4-isopropylphenyl)isoxazoline (2k)*

Yield 60%; white crystal; mp: 130-131°C; <sup>1</sup>H-NMR (300 MHz, DMSO-d<sub>6</sub>) δ: 7.05-7.50(m, 8H), 4.08-4.13 (dd, *J*=14.07 Hz, 1H), 3.12-3.19 (dd, *J*=19.86 Hz, 1H), 2.90-2.97 (dd, *J*=19.30 Hz, 1H), 2.76-2.85 (m, 1H), 1.14-1.16 (d, *J*=6.9 Hz, 6H); <sup>13</sup>C-NMR (DMSO-d<sub>6</sub>): 24.07, 30.72, 33.26, 63.46, 115.25, 125.79, 127.54, 128.09, 128.39, 130.57, 133.31, 139.61, 147.06, 154.18, 160.88, 164.14; HRMS *m/z* (M<sup>+</sup>): Calcd. for C<sub>18</sub>H<sub>18</sub>ClNO: 300.1077, found: 300.1072.

*3-(4-fluorophenyl)-5-(4-isopropylphenyl)isoxazoline (2l)*

Yield 55%; white powder; mp: 132-133°C; <sup>1</sup>H-NMR (300 MHz, DMSO-d<sub>6</sub>) δ: 6.95-7.49(m, 8H) 4.29-4.33 (dd, *J*=13.83 Hz, 1H), 3.55-3.62 (dd, *J*=22.08 Hz, 1H), 2.97-3.03 (dd, *J*=19.02 Hz, 1H), 2.85-2.90 (m, 1H), 1.21-1.23 (d, *J*=6.9 Hz, 6H); <sup>13</sup>C-NMR (DMSO-d<sub>6</sub>): 23.95, 30.22, 33.39, 64.47, 115.54, 126.93, 128.15, 128.49, 130.92, 133.81, 142.00, 148.40, 153.96, 160.97, 164.22 ; HRMS *m/z* (M<sup>+</sup>): Calcd. for C<sub>18</sub>H<sub>18</sub>FNO: 284.1372, found: 284.1377.

*3-phenyl-5-(4-isopropylphenyl)isoxazoline (2-U)*

Yield 66%; white powder; mp: 117-118°C; <sup>1</sup>H-NMR (300 MHz, DMSO-d<sub>6</sub>) δ: 6.98-7.44(m, 9H) 4.10-4.14 (dd, *J*=11.1 Hz, 1H), 3.10-3.17 (dd, *J*=13.56 Hz, 1H), 2.98-3.05 (dd, *J*=21.63 Hz, 1H), 2.78-2.81 (m, 1H), 1.16-1.19 (d, *J*=7.8 Hz, 6H); <sup>13</sup>C-NMR (DMSO-d<sub>6</sub>): 22.45, 24.37, 24.78, 31.33, 63.59, 127.24, 129.13, 133.39, 138.94, 147.88, 149.82, 154.02, 155.61; HRMS *m/z* (M<sup>+</sup>): Calcd. for C<sub>18</sub>H<sub>19</sub>NO: 265.3496, found: 265.3502.

*1-acetyl-3-(2-methylphenyl)-5-(4-isopropylphenyl)-2-pyrazoline (3a)*

Yield 70%; white powder; mp: 103-104°C; <sup>1</sup>H-NMR (300 MHz, CDCl<sub>3</sub>) δ: 7.37-7.16 (m, 8H), 5.49-5.54 (dd, *J*=16.08 Hz, 1H), 3.75-3.84 (dd, *J*=29.13 Hz, 1H), 3.19-3.26 (dd, *J*=21.93 Hz, 1H), 2.84-2.89 (m, 1H), 2.67 (s, 3H), 2.40 (s, 3H), 1.20-1.22 (d, *J*=6.93 Hz, 6H); <sup>13</sup>C-NMR (DMSO-d<sub>6</sub>): 21.89, 23.04, 23.96, 33.22, 44.37, 58.40, 125.57, 126.20, 126.65, 129.50, 130.06, 131.67, 137.37, 140.04, 147.36, 154.87, 167.58; HRMS *m/z* (M<sup>+</sup>): Calcd. for C<sub>21</sub>H<sub>24</sub>N<sub>2</sub>O: 320.4281, found: 320.4285.

*1-acetyl-3-(2-bromophenyl)-5-(4-isopropylphenyl)-2-pyrazoline (3b)*

Yield 77%; brown powder; mp: 123-124°C; <sup>1</sup>H-NMR (300 MHz, CDCl<sub>3</sub>) δ: 7.65-7.18 (m, 8H), 5.56-5.61 (dd, *J*=16.7 Hz, 1H), 3.64-3.73 (dd, *J*=27.63 Hz, 1H), 3.21-3.28 (dd, *J*=21.4, 1H), 2.84-2.88 (m, 1H), 2.40(s, 3H), 1.19-1.21 (d, *J*=6.9 Hz, 6H); <sup>13</sup>C-NMR (DMSO-d<sub>6</sub>): 21.87, 23.94,

33.21, 44.82, 59.44, 125.1, 126.62, 129.99, 130.21, 131.32, 131.80, 139.77, 147.40, 152.70, 167.68; HRMS  $m/z$  (M<sup>+</sup>): Calcd. for C<sub>20</sub>H<sub>21</sub>BrN<sub>2</sub>O: 385.2976, found: 385.2981.

*1-acetyl-3-(2-chlorophenyl)-5-(4-isopropylphenyl)-2-pyrazoline (3c)*

Yield 74%; white powder; mp: 110-111°C; <sup>1</sup>H-NMR (300 MHz, CDCl<sub>3</sub>) δ: 7.77- 7.25 (m, 8H), 5.55-5.60 (dd,  $J=16.2$  Hz, 1H), 3.87-3.97 (dd,  $J=29.9$  Hz, 1H), 3.29-3.37 (dd,  $J=22.5$  Hz, 1H), 2.84-2.89 (m, 1H), 2.41 (s, 3H), 1.20-1.22 (d,  $J=6.9$  Hz, 6H); <sup>13</sup>C-NMR (DMSO-d<sub>6</sub>): 21.83, 23.94, 33.21, 44.89, 59.35, 125.57, 126.66, 127.53, 130.24, 130.91, 131.84, 139.75, 147.46, 152.93, 167.77; HRMS  $m/z$  (M<sup>+</sup>): Calcd. for C<sub>20</sub>H<sub>21</sub>ClN<sub>2</sub>O: 340.8467, found: 340.8470.

*1-acetyl-3-(2-fluorophenyl)-5-(4-isopropylphenyl)-2-pyrazoline (3d)*

Yield 66%; white powder; mp: 81-82°C; <sup>1</sup>H-NMR (300 MHz, CDCl<sub>3</sub>) δ: 7.23-7.95 (m, 8H), 5.54-5.59 (dd,  $J=16.44$  Hz, 1H), 3.79-3.88 (dd,  $J=27.66$  Hz, 1H), 3.24-3.32 (dd,  $J=22.92$ , 1H), 2.82-2.91 (m, 1H), 2.42 (s, 3H), 1.20-1.22 (d,  $J=6.9$  Hz, 6H); <sup>13</sup>C-NMR (DMSO-d<sub>6</sub>): 21.88, 23.97, 33.23, 42.31, 59.60, 114.61, 117.80, 124.87, 125.93, 126.69, 130.40, 135.80, 139.94, 147.56, 152.72, 164.15, 167.73; HRMS  $m/z$  (M<sup>+</sup>): Calcd. for C<sub>20</sub>H<sub>21</sub>FN<sub>2</sub>O: 324.3919, found: 324.3925.

*1-acetyl-3-(3-methylphenyl)-5-(4-isopropylphenyl)-2-pyrazoline (3e)*

Yield 60%; white powder; mp: 115-116°C; <sup>1</sup>H-NMR (300 MHz, CDCl<sub>3</sub>) δ: 7.12-7.50 (m, 8H), 5.55-5.60 (dd,  $J=16.13$  Hz, 1H), 3.66-3.76 (dd,  $J=29.37$  Hz, 1H), 3.12-3.20 (dd,  $J=22.06$  Hz, 1H), 2.84-2.88 (m, 1H), 2.43 (s, 3H), 2.40 (s, 3H), 1.20-1.22 (d,  $J=6.93$  Hz, 6H); <sup>13</sup>C-NMR (DMSO-d<sub>6</sub>): 21.02, 21.85, 23.97, 33.23, 42.26, 59.25, 123.99, 125.50, 126.65, 127.17, 128.77, 131.22, 138.15, 140.03, 147.38, 154.37, 167.41; HRMS  $m/z$  (M<sup>+</sup>): Calcd. for C<sub>21</sub>H<sub>24</sub>N<sub>2</sub>O: 320.4281, found: 320.4286.

*1-acetyl-3-(3-bromophenyl)-5-(4-isopropylphenyl)-2-pyrazoline (3f)*

Yield 71%; yellow crystal; mp: 125-126°C <sup>1</sup>H-NMR (300 MHz, CDCl<sub>3</sub>) δ: 7.11-7.90(m, 1H), 5.56-5.61 (dd,  $J=16.4$  Hz, 1H), 3.64-3.74 (dd,  $J=29.5$  Hz, 1H), 3.09-3.16 (dd,  $J=22.2$  Hz, 1H), 2.84-2.88 (m, 1H), 2.42 (s, 3H), 1.20-1.22 (d,  $J=6.9$  Hz, 6H); <sup>13</sup>C-NMR (DMSO-d<sub>6</sub>): 21.87, 23.98, 33.22, 42.00, 59.58, 122.26, 125.59, 126.66, 129.07, 131.06, 132.98, 133.66, 139.83, 147.46, 153.07, 167.66; HRMS  $m/z$  (M<sup>+</sup>): Calcd. for C<sub>20</sub>H<sub>21</sub>BrN<sub>2</sub>O: 385.2976, found: 385.2982.

*1-acetyl-3-(3-chlorophenyl)-5-(4-isopropylphenyl)-2-pyrazoline (3g)*

Yield 63%; white powder; mp: 137-138°C; <sup>1</sup>H-NMR (300 MHz, CDCl<sub>3</sub>) δ: 7.18-7.75 (m, 8H), 5.56-5.61 (dd,  $J=16.3$  Hz, 1H), 3.65-3.75 (dd,  $J=29.5$  Hz, 1H), 3.09-3.17 (dd,  $J=22.2$  Hz, 1H),

2.82-2.90 (m, 1H), 2.42 (s, 3H), 1.20-1.22 (d,  $J=6.9$  Hz, 6H);  $^{13}\text{C}$ -NMR (DMSO- $d_6$ ): 21.82, 23.96, 33.23, 42.10, 59.57, 122.30, 125.51, 126.34, 128.99, 131.97, 133.68, 133.90, 139.89, 147.43, 153.10, 167.65; HRMS  $m/z$  ( $M^+$ ): Calcd. for  $\text{C}_{20}\text{H}_{21}\text{ClN}_2\text{O}$ : 340.8467, found: 340.8470.

*1-acetyl-3-(3-fluorophenyl)-5-(4-isopropylphenyl)-2-pyrazoline (3h)*

Yield 69%; buff crystal; mp: 109-110°C;  $^1\text{H}$ -NMR (300 MHz,  $\text{CDCl}_3$ )  $\delta$ : 7.12-7.50 (m, 8H), 5.56-5.62 (dd,  $J=16.45$  Hz, 1H), 3.66-3.76 (dd,  $J=29.48$  Hz, 1H), 3.10-3.18 (dd,  $J=22.20$  Hz, 1H), 2.84-2.89 (m, 1H), 2.42 (s, 3H) 1.20-1.22 (d,  $J=6.9$  Hz, 6H);  $^{13}\text{C}$ -NMR (DMSO- $d_6$ ): 21.81, 23.95, 33.23, 42.14, 59.58, 113.41, 117.26, 122.94, 125.57, 126.66, 131.04, 133.73, 139.87, 147.45, 153.29, 160.78, 164.02, 167.64; HRMS  $m/z$  ( $M^+$ ): Calcd. for  $\text{C}_{20}\text{H}_{21}\text{FN}_2\text{O}$ : 324.3919, found: 324.3924.

*1-acetyl-3-(4-methylphenyl)-5-(4-isopropylphenyl)-2-pyrazoline (3i)*

Yield 80%; white powder; mp: 97-98°C;  $^1\text{H}$ -NMR (300 MHz,  $\text{CDCl}_3$ )  $\delta$ : 7.12-7.64 (m, 8H), 5.54-5.59 (dd,  $J=16.17$  Hz, 1H), 3.65-3.75 (dd,  $J=29.31$  Hz, 1H), 3.11-3.19 (dd,  $J=22.02$  Hz, 1H), 2.81-2.90 (m, 1H), 2.42 (s, 3H), 2.39(s, 3H) 1.19-1.22 (d,  $J=6.9$  Hz, 6H);  $^{13}\text{C}$ -NMR (DMSO- $d_6$ ): 21.13, 21.83, 23.96, 42.24, 59.22, 125.52, 126.71, 128.55, 129.45, 140.22, 147.35, 154.27, 167.33; HRMS  $m/z$  ( $M^+$ ): Calcd. for  $\text{C}_{21}\text{H}_{24}\text{N}_2\text{O}$ : 320.4281, found: 320.4287.

*1-acetyl-3-(4-bromophenyl)-5-(4-isopropylphenyl)-2-pyrazoline-1 (3j)*

Yield 66%; brown powder; mp: 126-127°C;  $^1\text{H}$ -NMR (300 MHz,  $\text{CDCl}_3$ )  $\delta$ : 7.14-7.65 (m, 8H), 5.56-5.61 (dd,  $J=16.30$  Hz, 1H), 3.65-3.74 (dd,  $J=29.43$  Hz, 1H), 3.09-3.16 (dd,  $J=22.20$  Hz, 1H), 2.81-2.90 (m, 1H), 2.41 (s, 3H), 1.19-1.22 (d,  $J=6.9$  Hz, 6H);  $^{13}\text{C}$ -NMR (DMSO- $d_6$ ): 21.84, 23.96, 33.22, 42.05, 59.54, 123.75, 125.55, 126.66, 128.67, 130.52, 131.88, 139.88, 147.43, 153.38, 167.54; HRMS  $m/z$  ( $M^+$ ): Calcd. for  $\text{C}_{20}\text{H}_{21}\text{BrN}_2\text{O}$ : 385.2976, found: 385.2981.

*1-acetyl-3-(4-chlorophenyl)-5-(4-isopropylphenyl)-2-pyrazoline (3k)*

Yield 77%; white powder; mp: 118-119°C;  $^1\text{H}$ -NMR (300 MHz,  $\text{CDCl}_3$ )  $\delta$ : 7.13-7.75 (m, 8H), 5.56-5.61 (dd,  $J=16.23$  Hz, 1H), 3.66-3.76 (dd,  $J=29.4$  Hz, 1H), 3.10-3.18 (dd,  $J=22.11$  Hz, 1H), 2.82-2.90 (m, 1H), 2.41 (s, 3H), 1.20-1.22 (d,  $J=6.9$  Hz, 6H);  $^{13}\text{C}$ -NMR (DMSO- $d_6$ ): 21.79, 23.92, 33.19, 42.25, 59.44, 116.06, 125.53, 126.62, 127.88, 129.12, 139.93, 147.39, 153.36, 161.70, 164.99, 167.43; HRMS  $m/z$  ( $M^+$ ): Calcd. for  $\text{C}_{20}\text{H}_{21}\text{ClN}_2\text{O}$ : 340.8467, found: 340.8472.

*1-acetyl-3-(4-fluorophenyl)-5-(4-isopropylphenyl)-2-pyrazoline (3l)*

Yield 63%; white powder; mp: 106-107°C;  $^1\text{H}$ -NMR (300 MHz,  $\text{CDCl}_3$ )  $\delta$ : 7.15-7.77 (m, 8H),

5.56-5.61 (t,  $J=16.23$  Hz, 1H), 3.66-3.76 (dd,  $J=29.3$  Hz, 1H), 3.10-3.18 (dd,  $J=22.2$  Hz, 1H), 2.84-2.92 (m, 1H), 2.41 (s, 3H), 1.20-1.22 (d,  $J=6.9$  Hz, 6H);  $^{13}\text{C-NMR}$  (DMSO- $d_6$ ): 21.82, 23.96, 33.23, 42.28, 59.45, 115.80, 116.09, 125.55, 126.65, 127.94, 129.04, 139.96, 147.41, 153.39, 167.45; HRMS  $m/z$  ( $M^+$ ): Calcd. for  $\text{C}_{20}\text{H}_{21}\text{FN}_2\text{O}$ : 324.3919, found: 324.3925.

*1-acetyl-3-phenyl-5-(4-isopropylphenyl)-2-pyrazoline (3-U)*

Yield 78%; white powder; mp: 91-92°C;  $^1\text{H-NMR}$  (300 MHz,  $\text{CDCl}_3$ )  $\delta$ : 7.16-7.69 (m, 9H), 5.57-5.65 (dd,  $J=15.84$  Hz, 1H), 3.69-3.79 (dd,  $J=29.30$  Hz, 1H), 3.16-3.24 (dd,  $J=24.36$  Hz, 1H), 2.85-2.95 (m, 1H), 2.49 (s, 3H), 1.21-1.24 (d,  $J=6.9$  Hz, 6H);  $^{13}\text{C-NMR}$  (DMSO- $d_6$ ): 21.76, 24.22, 42.42, 59.45, 126.13, 127.08, 129.20, 130.04, 140.88, 148.01, 155.03, 167.63; HRMS  $m/z$  ( $M^+$ ): Calcd. for  $\text{C}_{20}\text{H}_{22}\text{N}_2\text{O}$ : 306.4015, found: 306.4018.

**Table S1.** The structure, yield and melting point of title compounds

| Compounds         | Linking cycle | R                         | Appearance     | Yield | Mp (°C ) |
|-------------------|---------------|---------------------------|----------------|-------|----------|
| 2a                | isoxazoline   | <i>o</i> -CH <sub>3</sub> | white powder   | 57%   | 124-125  |
| 2b                | isoxazoline   | <i>o</i> -Br              | brown powder   | 49%   | 152-153  |
| 2c                | isoxazoline   | <i>o</i> -Cl              | white powder   | 53%   | 138-139  |
| 2d                | isoxazoline   | <i>o</i> -F               | buff crystal   | 50%   | 143-144  |
| 2e                | isoxazoline   | <i>m</i> -CH <sub>3</sub> | white powder   | 60%   | 114-115  |
| 2f                | isoxazoline   | <i>m</i> -Br              | gray powder    | 65%   | 143-144  |
| 2g                | isoxazoline   | <i>m</i> -Cl              | white powder   | 62%   | 134-135  |
| 2h                | isoxazoline   | <i>m</i> -F               | yellow crystal | 61%   | 156-157  |
| 2i                | isoxazoline   | <i>p</i> -CH <sub>3</sub> | white crystal  | 67%   | 115-116  |
| 2j                | isoxazoline   | <i>p</i> -Br              | gray crystal   | 57%   | 125-126  |
| 2k                | isoxazoline   | <i>p</i> -Cl              | white crystal  | 60%   | 130-131  |
| 2l                | isoxazoline   | <i>p</i> -F               | white powder   | 55%   | 132-133  |
| 2-U <sup>a)</sup> | isoxazoline   | H                         | white powder   | 66%   | 117-118  |
| 3a                | pyrazoline    | <i>o</i> -CH <sub>3</sub> | white powder   | 70%   | 103-104  |
| 3b                | pyrazoline    | <i>o</i> -Br              | brown powder   | 77%   | 123-124  |
| 3c                | pyrazoline    | <i>o</i> -Cl              | white powder   | 74%   | 110-111  |
| 3d                | pyrazoline    | <i>o</i> -F               | white powder   | 66%   | 81-82    |
| 3e                | pyrazoline    | <i>m</i> -CH <sub>3</sub> | white powder   | 60%   | 115-116  |
| 3f                | pyrazoline    | <i>m</i> -Br              | yellow crystal | 71%   | 125-126  |
| 3g                | pyrazoline    | <i>m</i> -Cl              | white powder   | 63%   | 137-138  |
| 3h                | pyrazoline    | <i>m</i> -F               | buff crystal   | 69%   | 109-110  |
| 3i                | pyrazoline    | <i>p</i> -CH <sub>3</sub> | white powder   | 80%   | 97-98    |
| 3j                | pyrazoline    | <i>p</i> -Br              | brown powder   | 66%   | 126-127  |
| 3k                | pyrazoline    | <i>p</i> -Cl              | white powder   | 77%   | 118-119  |
| 3l                | pyrazoline    | <i>p</i> -F               | white powder   | 63%   | 106-107  |
| 3-U <sup>b)</sup> | pyrazoline    | H                         | white powder   | 78%   | 91-92    |

<sup>a)</sup> Unsubstituted isoxazoline derivatives

<sup>b)</sup> Unsubstituted pyrazoline derivatives



**Table S2** EC<sub>50</sub> values of compounds containing fluorine atom against  
six fungi

| Compound      | EC <sub>50</sub> ± SE (µg·mL <sup>-1</sup> ) |                      |                   |                     |                  |                        |
|---------------|----------------------------------------------|----------------------|-------------------|---------------------|------------------|------------------------|
|               | <i>B. cinerea</i>                            | <i>C. lagenarium</i> | <i>Py. oryzae</i> | <i>Ph. piricola</i> | <i>R. solani</i> | <i>S. sclerotiorum</i> |
| <b>2d</b>     | 18.75 ± 1.66                                 | 53.38 ± 4.26         | 15.58 ± 1.27      | 7.25 ± 0.64         | 16.83 ± 1.34     | 34.53 ± 2.42           |
| <b>2h</b>     | 33.36 ± 2.87                                 | 188.54 ± 15.54       | 55.64 ± 4.81      | 10.51 ± 0.84        | >200             | 22.59 ± 1.50           |
| <b>2l</b>     | 77.84 ± 7.15                                 | 110.23 ± 10.05       | 132.27 ± 11.04    | 13.68 ± 0.95        | 163.26 ± 12.21   | 20.80 ± 1.43           |
| <b>3d</b>     | 14.28 ± 0.13                                 | 95.51 ± 8.57         | 20.87 ± 1.65      | 15.67 ± 1.18        | 84.61 ± 7.25     | 12.75 ± 0.88           |
| <b>3h</b>     | 69.87 ± 6.33                                 | 153.89 ± 13.84       | 86.93 ± 8.03      | 60.08 ± 5.27        | >200             | 20.76 ± 1.61           |
| <b>3l</b>     | 82.41 ± 7.38                                 | 133.67 ± 11.36       | 147.43 ± 12.24    | 47.36 ± 4.05        | 170.63 ± 14.30   | 22.80 ± 1.60           |
| Cuminaldehyde | 66.94 ± 5.80                                 | >200                 | 128.95 ± 9.46     | 25.50 ± 1.83        | 96.75 ± 8.84     | 63.62 ± 5.45           |
| Thiabendazole | 18.85 ± 1.62                                 | 47.35 ± 3.69         | 73.21 ± 6.53      | 21.84 ± 1.73        | 10.56 ± 0.75     | 44.57 ± 3.36           |
| Azoxystrobin  | 54.52 ± 4.79                                 | 96.88 ± 8.75         | 70.82 ± 6.04      | 87.59 ± 7.80        | 92.57 ± 8.16     | 35.22 ± 2.77           |
